# Supplementary material
Source: Springer Nature journal article supplement (https://www.springermedizin.de/resource/supplementary/13075_2011_3545_MOESM7_ESM.pdf/9694546)

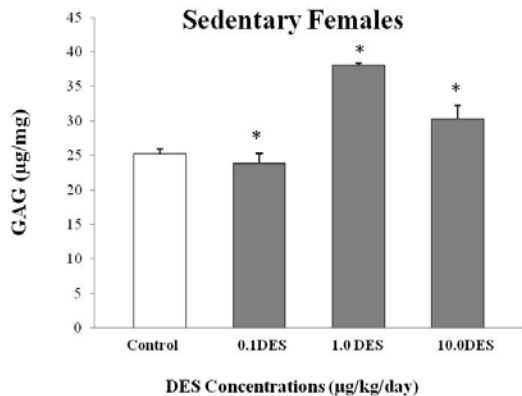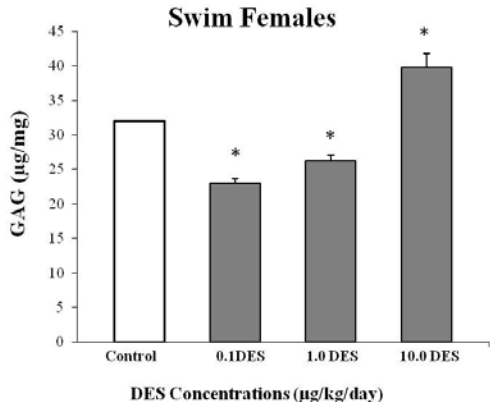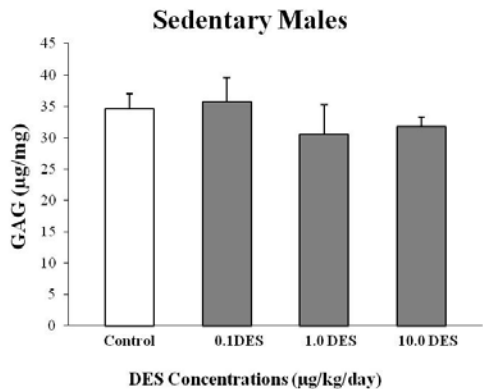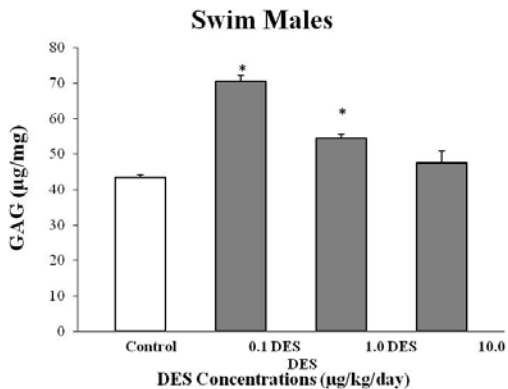

Supplement: MOESM7 [file 9694546]
